# Supplementary material
Source: HighWire-hosted journal article supplement (https://bmjopen.bmj.com/content/11/2/e038624)
Supplement: inline-supplementary-material-1 [file inline-supplementary-material-1.pdf]

## Appendix A

| Profession                        | # of clinics <sup>x</sup><br>(%)<br>(max.: 34) | Mean EFT<br>(SD) | Public<br>Mean EFT<br>(SD) | Private<br>Mean EFT<br>(SD) | metropolitan<br>Mean EFT<br>(SD) | regional<br>Mean EFT<br>(SD) | public vs<br>private –<br><i>p</i> <sup>^</sup> | metropolitan<br>vs regional<br><i>p</i> <sup>^</sup> |
|-----------------------------------|------------------------------------------------|------------------|----------------------------|-----------------------------|----------------------------------|------------------------------|-------------------------------------------------|------------------------------------------------------|
| Geriatrician                      | 26 (76%)                                       | 1.23 (2.14)      | 0.77 (1.71)                | 1.41 (2.51)                 | 1.33 (2.45)                      | 0.39 (0.03)                  | .163                                            | .274                                                 |
| Clinical coordinator <sup>+</sup> | 15 (44%)                                       | 0.52 (0.34)      | 0.32 (0.37)                | 0.01 (0.03)                 | 0.24 (0.35)                      | 0.24 (0.35)                  | .020*                                           | .986                                                 |
| Clinical<br>Neuropsychologist     | 13 (38%)                                       | 0.69 (0.59)      | 0.32 (0.54)                | 0.11 (0.33)                 | 0.34 (0.55)                      | 0.16 (0.41)                  | .140                                            | .180                                                 |
| Trainee doctor                    | 10 (29%)                                       | 0.68 (1.52)      | 0.28 (0.49)                | 0                           | 0.35 (1.13)                      | 0.01 (0.03)                  | .072                                            | .038*                                                |
| Registered nurse                  | 9 (26%)                                        | 0.78 (0.54)      | 0.28 (0.49)                | 0                           | 0.17 (0.33)                      | 0.26 (0.57)                  | .120                                            | .849                                                 |
| Occupational<br>Therapists        | 8 (24%)                                        | 0.81 (0.59)      | 0.26 (0.50)                | 0                           | 0.28 (0.55)                      | 0.06 (0.17)                  | .163                                            | .377                                                 |
| Social worker                     | 8 (24%)                                        | 0.23 (0.16)      | 0.08 (0.14)                | 0                           | 0.07 (0.12)                      | 0.04 (0.13)                  | .154                                            | .199                                                 |
| Psychiatrist                      | 6 (18%)                                        | 0.28 (0.36)      | 0.07 (0.20)                | 0                           | 0.07 (0.22)                      | 0.01 (0.05)                  | .298                                            | .416                                                 |
| Clinical Psychologist             | 4 (12%)                                        | 0.63 (0.40)      | 0.10 (0.27)                | 0                           | 0.03 (0.08)                      | 0.14 (0.34)                  | .489                                            | .416                                                 |
| Speech Pathologist                | 4 (12%)                                        | 0.16 (0.16)      | 0.03 (0.08)                | 0                           | 0.01 (0.03)                      | 0.03 (0.11)                  | .489                                            | .743                                                 |
| Neurologist                       | 3 (9%)                                         | 0.20 (0.10)      | 0.02 (0.07)                | 0                           | 0.03 (0.08)                      | 0                            | .618                                            | .478                                                 |
| Rehabilitation<br>Physician       | 1 (3%)                                         | 0.30             | n/a                        | n/a                         | n/a                              | n/a                          | n/a                                             | n/a                                                  |
| Aged Care Physician               | 1 (3%)                                         | 0.30             | n/a                        | n/a                         | n/a                              | n/a                          | n/a                                             | n/a                                                  |
| Consultant Physician              | 1 (3%)                                         | 0.20             | n/a                        | n/a                         | n/a                              | n/a                          | n/a                                             | n/a                                                  |
| General Practitioner              | 1 (3%)                                         | 0.20             | n/a                        | n/a                         | n/a                              | n/a                          | n/a                                             | n/a                                                  |

EFT = effective full time (1.0 = 35 hours/ week).

<sup>x</sup> # of clinics who reported that this profession is part of their team<sup>+</sup> paid time uniquely dedicated to clinic administration tasks<sup>^</sup> Mann-Whitney-U test used due to skewed data\* significant *p* value, *p* < .05
